# Supplementary material
Source: PubMed Central journal article supplement (PMC7243615)
Supplement: NIHMS1067914-supplement-1.pdf [file NIHMS1067914-supplement-1.pdf]

Supplemental Table 1: Predictive Power of Renal Insufficiency and Dialysis on 30-day mortality

| Variable                            | OR          | 95% CI           | P-value          |
|-------------------------------------|-------------|------------------|------------------|
| <b>Renal Criteria - No Dialysis</b> | <b>3.36</b> | <b>1.79-6.31</b> | <b>&lt;0.001</b> |
| <b>Renal Criteria - On Dialysis</b> | <b>2.22</b> | <b>1.49-3.31</b> | <b>&lt;0.001</b> |
