# Supplementary material
Source: PubMed Central journal article supplement (PMC7243615)

Supplemental Figure 1: Total number of High-Risk Cases drops after 2010

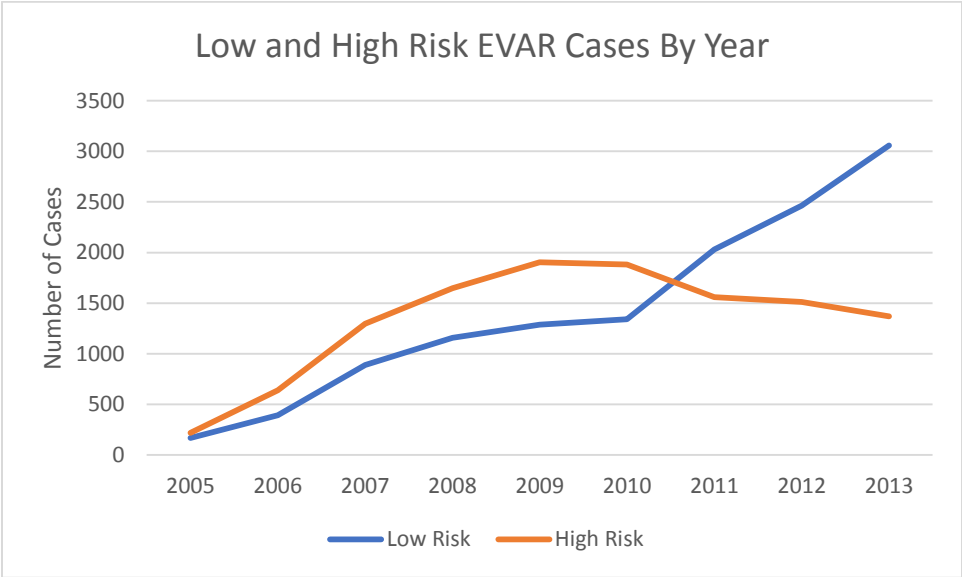

Supplement: NIHMS1067914-supplement-2.pdf [file NIHMS1067914-supplement-2.pdf]
